# Supplementary material
Source: PubMed Central journal article supplement (PMC4690201)
Supplement: NIHMS745316-supplement-Supplemental.pdf [file NIHMS745316-supplement-Supplemental.pdf]

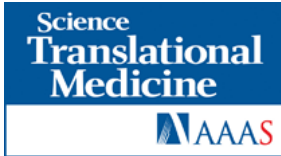

www.sciencetranslationalmedicine.org/cgi/content/full/7/271/271ps1/DC1

## Supplementary Materials for

### **Cancer and the gut microbiota: An unexpected link**

Laurence Zitvogel,\* Lorenzo Galluzzi, Sophie Viaud, Marie Vétizou, Romain Daillère,  
Miriam Merad, Guido Kroemer

\*Corresponding author. E-mail: [laurence.zitvogel@gustaveroussy.fr](mailto:laurence.zitvogel@gustaveroussy.fr)

Published 21 January 2015, *Sci. Transl. Med.* **7**, 271ps1 (2015)  
DOI: 10.1126/scitranslmed.3010743

#### **This PDF file includes:**

Table S1. Links between the gastrointestinal side effects of common anticancer regimens and the gut microbiota.

**Supplementary Table 1. Links between the gastrointestinal side effects of common anticancer regimens and the gut microbiota**

| Therapeutic agent(s)                  | Main indication(s)                                               | Macroscopic abnormalities                                                                    | Histopathological changes                                                                                                 | Molecular and microbial correlates                                                                                                                                                                                                                                                                                                                                                                                  | Preventive measures                                                                                                                    |
|---------------------------------------|------------------------------------------------------------------|----------------------------------------------------------------------------------------------|---------------------------------------------------------------------------------------------------------------------------|---------------------------------------------------------------------------------------------------------------------------------------------------------------------------------------------------------------------------------------------------------------------------------------------------------------------------------------------------------------------------------------------------------------------|----------------------------------------------------------------------------------------------------------------------------------------|
| <i>Conventional anticancer agents</i> |                                                                  |                                                                                              |                                                                                                                           |                                                                                                                                                                                                                                                                                                                                                                                                                     |                                                                                                                                        |
| 5-fluorouracil                        | Breast carcinoma<br>Head and neck cancer<br>Colorectal carcinoma | Mucositis<br>Diarrhea<br>Weight loss                                                         | Degeneration of villi and crypts<br>Apoptosis/necrosis among IECs<br>Immune infiltration in the LP                        | TP53/BAX axis<br>TNF $\alpha$ /NF- $\kappa$ B/iNOS<br>IL-1 $\beta$ /IL-1RA, IL-4<br>Dihydropyrimidine dehydrogenase deficiency<br>Increase in <i>Staphylococcus spp.</i> , <i>Clostridium spp.</i> , <i>E. coli</i> , and facultative anaerobes<br>Decrease in <i>Lactobacillus spp.</i> and <i>Bacteroides spp.</i><br>Modifications in <i>Clostridium</i> cluster IV, XI and XIVa (when combined with irinotecan) | Opioid agonists<br>Oxycodone<br>R-Spondin 1<br>TLR5 agonists<br>IL-1RA<br>GLP2<br>iNOS/COX2 inhibitors<br>Curcumin<br>FGF7<br>Butyrate |
| Cisplatin                             | Testicular cancer<br>NSCLC<br>Ovarian carcinoma                  | Diarrhea<br>Weight loss                                                                      | Degeneration of villi and crypts<br>Goblet cell depletion<br>Apoptosis/necrosis among IECs and endothelial cells<br>Edema | TP53/BAX axis<br>acid sphingomyelinase<br>Diarrhea-dependent depletion of the gut microbiota                                                                                                                                                                                                                                                                                                                        | TNF $\alpha$ antagonists<br>Sodium selenosulfate                                                                                       |
| Cyclophosphamide                      | Leukemia<br>Lymphoma<br>Brain cancer                             | Mucositis (mice)<br>Diarrhea (mice, patients)<br>Weight loss (mice)<br>Stomatitis (patients) | Shortening of villi<br>Immune infiltration in the LP<br>Edema<br>Increased proliferation of Paneth and goblet cells       | ABCC4<br>Diarrhea-dependent depletion of the gut microbiota                                                                                                                                                                                                                                                                                                                                                         | IL-1RA<br>Enteral alanyl-glutamine                                                                                                     |

|              |                                                            |                                                                                |                                                                                                                                                              |                                                                                                                                                                                                                                                                                                            |                                                                                                                                        |
|--------------|------------------------------------------------------------|--------------------------------------------------------------------------------|--------------------------------------------------------------------------------------------------------------------------------------------------------------|------------------------------------------------------------------------------------------------------------------------------------------------------------------------------------------------------------------------------------------------------------------------------------------------------------|----------------------------------------------------------------------------------------------------------------------------------------|
| Docetaxel    | Breast carcinoma<br>NSCLC<br>Prostate carcinoma            | Neutropenic enterocolitis<br>Diarrhea<br>Colitis                               | Severe erosive esophago-<br>gastroduodenitis                                                                                                                 | Diarrhea-dependent depletion<br>of the gut microbiota                                                                                                                                                                                                                                                      | Loperamide                                                                                                                             |
| Paclitaxel   | Breast carcinoma<br>NSCLC<br>Ovarian carcinoma             | Weight loss (mice)<br>GI symptoms (patients)<br>Oral candidiasis<br>(patients) | Reduction of villi depth (mice)<br>Apoptosis in crypts (mice)<br>Mitotic arrest and apoptosis/<br>necrosis among IECs (patients)                             | Diarrhea-dependent depletion<br>of the gut microbiota                                                                                                                                                                                                                                                      | Dairy milk products                                                                                                                    |
| Doxorubicin  | Leukemia<br>Hodgkin's lymphoma<br>Multiple solid tumors    | Mucositis                                                                      | Degeneration of villi and crypts<br>Massive enterocyte apoptosis<br>Immune infiltration in the LP                                                            | BMP4<br>TLR2/GSK-3 $\beta$<br>TLR9                                                                                                                                                                                                                                                                         | GSK-3 $\beta$ inhibitors<br>Dexrazoxane                                                                                                |
| Ifosfamide   | Testicular cancer<br>Breast carcinoma<br>Lymphoma          | GI symptoms (patients)                                                         | Reduction of villi depth<br>Mitotic arrest and apoptosis/<br>necrosis among IECs                                                                             | Diarrhea-dependent depletion<br>of the gut microbiota                                                                                                                                                                                                                                                      | MESNA                                                                                                                                  |
| Irinotecan   | Colorectal carcinoma                                       | Delayed diarrhea<br>Severe mucositis<br>Weight loss<br>Mortality               | Degeneration of villi and crypts<br>Goblet cell depletion<br>Mucin hypersecretion<br>and malabsorption<br>Extensive intestinal<br>inflammation and apoptosis | TNF $\alpha$ /NF- $\kappa$ B/iNOS<br>IL-1 $\beta$ /IL-18, IL-6<br>Bacterial $\beta$ -glucuronidase<br>Increase in <i>E. coli</i> and<br><i>Staphylococcus spp.</i><br>Decrease in <i>Lactobacillus spp.</i><br>Modifications in <i>Clostridium</i><br>cluster IV, XI and XIVa (when<br>combined with 5-FU) | RDP58<br>Broad-spectrum antibiotics<br>Loperamide<br>Probiotic VSL#3<br>PHY906<br>Thalidomide<br>Pentoxifylline<br>Inhibition of IL-18 |
| Melphalan    | Multiple myeloma<br>Ovarian carcinoma<br>HSCT conditioning | Mucositis (mice, patients)<br>Severe diarrhea (mice,<br>patients)              | Degeneration of villi and crypts<br>Necrosis among IECs                                                                                                      | SLC7A5<br>Diarrhea-dependent depletion<br>of the gut microbiota                                                                                                                                                                                                                                            | Amifostine                                                                                                                             |
| Methotrexate | Breast carcinoma<br>Leukemia<br>Lymphoma<br>Osteosarcoma   | Diarrhea<br>Stomatitis<br>Weight loss                                          | Mitotic arrest and apoptosis/<br>necrosis among IECs<br>Structural alterations of<br>Paneth and goblet cells<br>Immune infiltration in the LP                | BAX/BCL2 system<br>Diarrhea-dependent depletion<br>of the gut microbiota                                                                                                                                                                                                                                   | Dietary TGF $\beta$ 2<br>supplementation<br>Calcium folinate plus<br>amifostine<br>Oral glutamine (?)                                  |

|                                                                      |                                                                  |                                                                                                                                |                                                                                                                             |                                                                                                                                   |                                                                        |
|----------------------------------------------------------------------|------------------------------------------------------------------|--------------------------------------------------------------------------------------------------------------------------------|-----------------------------------------------------------------------------------------------------------------------------|-----------------------------------------------------------------------------------------------------------------------------------|------------------------------------------------------------------------|
| Radiation therapy<br>Total body irradiation                          | Leukemia<br>Lymphoma<br>Solid tumors                             | Proctitis (patients)<br>Fistula (patients)<br>Enteritis (patients)<br>Diarrhea (patients)<br>Mucositis (mice)<br>Ulcers (mice) | Mitotic arrest and massive<br>apoptosis/necrosis among IECs<br>Edema<br>Increased proliferation of goblet cells             | TP53/BAX axis<br>Increase in <i>Actinobacteria</i><br><i>spp.</i> and <i>Bacillus spp.</i><br>Decrease in <i>Clostridium spp.</i> | Loperamide<br>Supportive care<br>Tempol<br>Glutamine (?)<br>Probiotics |
| <i>Targeted anticancer agents</i>                                    |                                                                  |                                                                                                                                |                                                                                                                             |                                                                                                                                   |                                                                        |
| EGFR and ERBB2<br>inhibitors<br>(erlotinib, gefitinib,<br>lapatinib) | Breast carcinoma<br>NSCLC<br>Pancreatic carcinoma                | Stomatitis<br>Mucositis<br>Diarrhea                                                                                            | Degeneration of villi and crypts (mice)<br>Increased proliferation rate among IECs<br>and goblet cells in the jejunum (rat) | Diarrhea-dependent depletion<br>of the gut microbiota                                                                             | Supportive care<br>Dose reduction<br>Discontinuation<br>GLP2           |
| MEK inhibitors<br>(RO49876559)                                       | Melanoma<br>Solid tumors                                         | Stomatitis<br>Diarrhea                                                                                                         | Not described                                                                                                               | Diarrhea-dependent depletion<br>of the gut microbiota                                                                             | Dose reduction<br>Discontinuation                                      |
| MTOR inhibitors<br>(everolimus,<br>sirolimus)                        | Renal cell carcinoma<br>Pancreatic carcinoma<br>Breast carcinoma | Stomatitis<br>Oral ulcers<br>Mucositis<br>Diarrhea                                                                             | Degeneration of crypts (mice)                                                                                               | Diarrhea-dependent depletion<br>of the gut microbiota                                                                             | Supportive care<br>Dose reduction                                      |

For additional information please see Refs (1) and (13). ABCC4, ATP-binding cassette, sub-family C (CFTR/MRP), member 4; BAX, BCL2-associated X protein; BMP4, bone morphogenetic protein 4; COX2, cyclooxygenase 2; EGFR, epidermal growth factor receptor; ERBB2, *v-erb-b2* avian erythroblastic leukemia viral oncogene homolog 2; FGF7, fibroblast growth factor 7; GI, gastrointestinal; GLP2, glucagon-like peptide 2; GSK-3 $\beta$ , glycogen synthase kinase 3 $\beta$ ; IEC; intestinal epithelial cell; IL, interleukin; IL-1RA, IL-1 receptor antagonist; iNOS, inducible nitric oxide synthase; LP, lamina propria; MEK, MAPK/ERK kinase; MESNA, 2-mercaptoethane sulfonate; MTOR, mechanistic target of rapamycin; NSCLC, non-small cell lung carcinoma; SLC7A5, solute carrier family 7 (amino acid transporter light chain, L system), member 5; TGF $\beta$ 2, transforming growth factor  $\beta$ 2; TLR, Toll-like receptor; TNF $\alpha$ , tumor necrosis factor  $\alpha$ ; TP53, tumor protein p53.
